# Supplementary material for: Interleukin4Rα (IL4Rα) and IL13Rα1 Are Associated with the Progress of Renal Cell Carcinoma through Janus Kinase 2 (JAK2)/Forkhead Box O3 (FOXO3) Pathways
Source: PubMed Central journal article supplement (PMC6770213; doi:10.3390/cancers11091394), 2019-09-18
Supplement: cancers-11-01394-s001.pdf [file cancers-11-01394-s001.pdf]

## Supplementary Materials: Interleukin4R $\alpha$ (IL4R $\alpha$ ) and IL13R $\alpha$ 1 Are Associated with the Progress of Renal Cell Carcinoma through Janus Kinase 2 (JAK2)/Forkhead Box O3 (FOXO3) Pathways

Mi-Ae Kang, Jongsung Lee, Sang Hoon Ha, Chang Min Lee, Kyoung Min Kim, Kyu Yun Jang and See-Hyoung Park

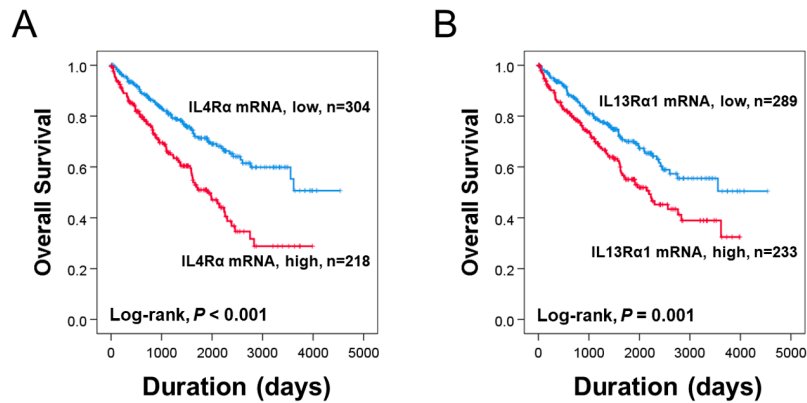

**Figure S1.** Higher expression of mRNA of both IL4R $\alpha$  and IL13R $\alpha$ 1 are associated with shorter survivor of clear cell renal carcinoma patients. Kaplan-Meier survivor analysis according to the RNA expression of IL4R $\alpha$ (A) and IL13R $\alpha$ 1(B) in clear cell renal carcinoma. The data for mRNA expression of IL4R $\alpha$  and IL13R $\alpha$ 1, and survival data of clear cell carcinoma patients were obtained from the OncoLnc database (<http://www.oncolnc.org>. Accessed 12 July 2019).

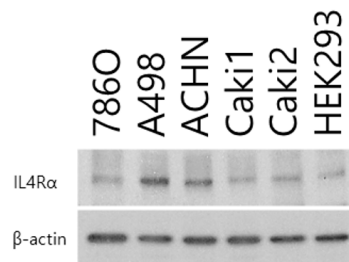

**Figure S2.** Western blot analysis of IL4R $\alpha$  expression in RCC cell lines. B-actin was used for a gel-loading control.

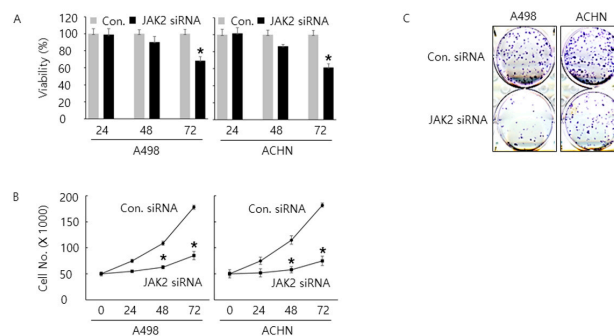

**Figure S3.** Anti-cancer effect by transfection of siRNA against JAK2 in A498 and ACHN cells. Time-dependent anti-cancer effect by transfection of siRNA against JAK2 in A498 and ACHN cells for 24, 48 and 72 h incubation assay. (A) WST-1 assay. (B) cell counting assay, respectively. These results are representative data from three biological replicates and the error bar indicates standard error (STE). \*indicates the  $p$ -value < 0.05. (C) Anti-colony formation ability by transfection of siRNA against JAK2 in A498 and ACHN cells was determined by colony formation assay for 14 days after transfection. These results are representative data from three biological replicates.

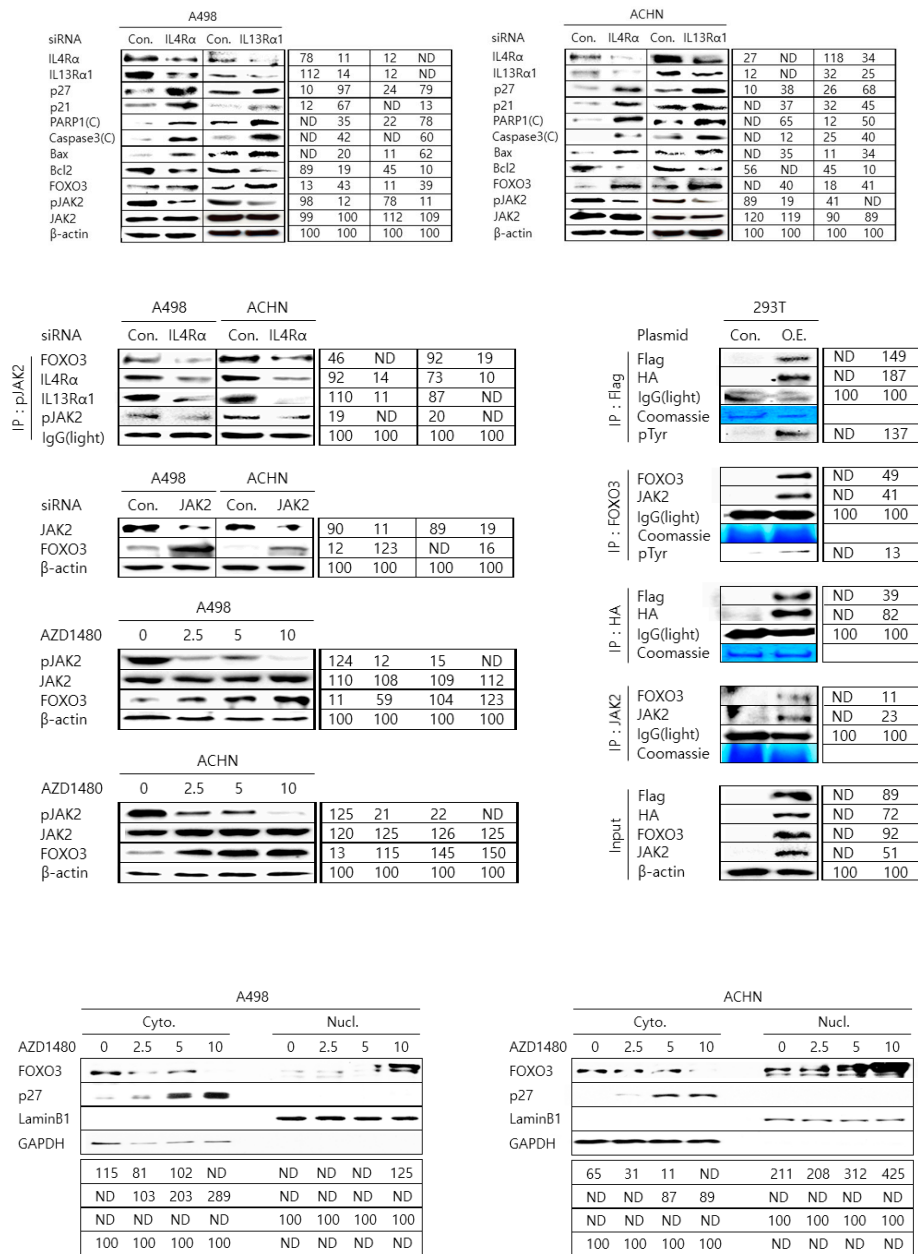

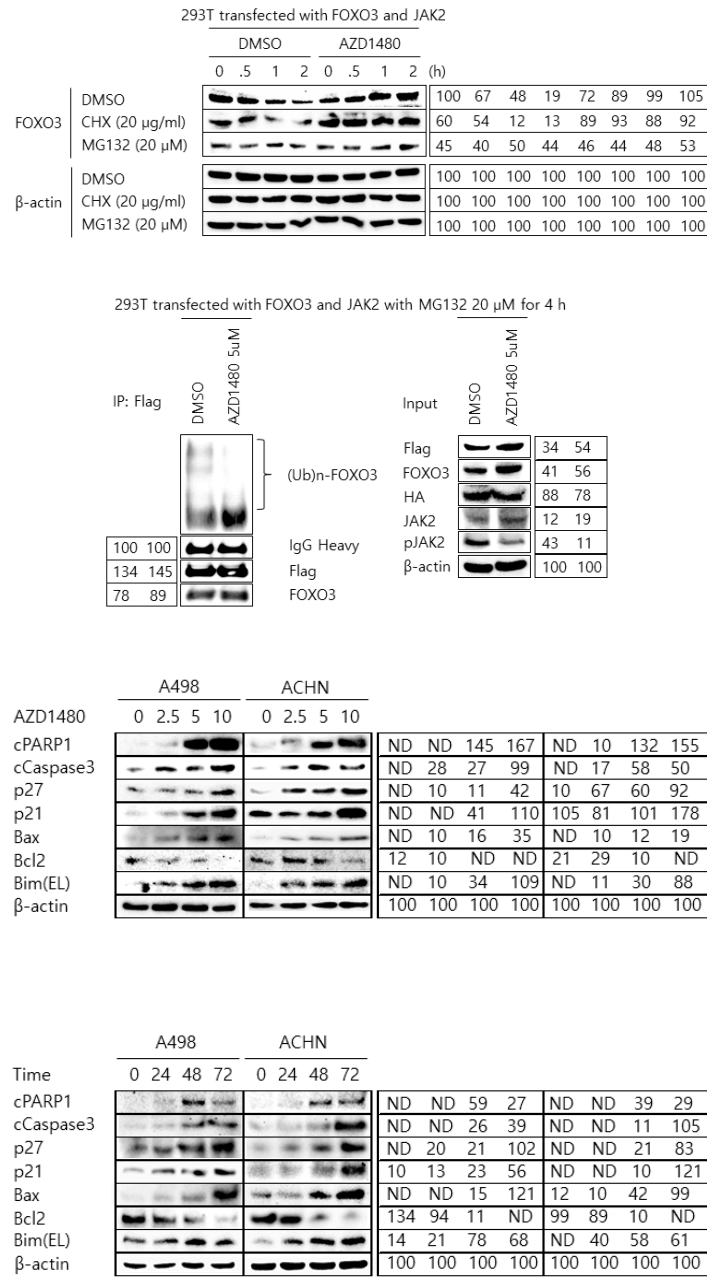

**Figure S4.** Western blot densitometry analysis. Data are shown as the relative density of each band compared to that of β-actin, IgG, GAPDH, or LaminB1.
